# Supplementary material
Source: Springer Nature journal article supplement (https://www.springermedizin.de/resource/supplementary/12931_2011_1135_MOESM3_ESM.pdf/9425412)

day0

2<sup>nd</sup> passage day 10 after treatment with the conditioned medium

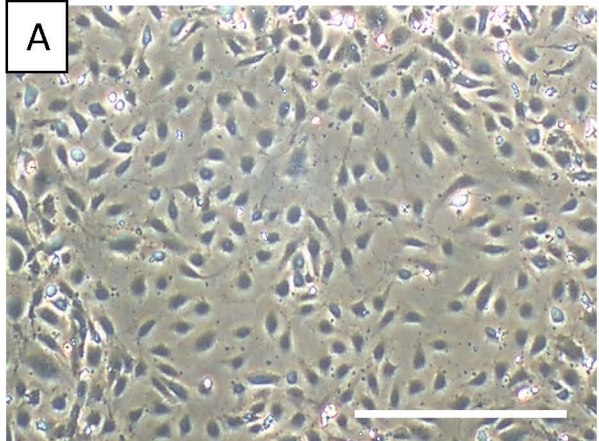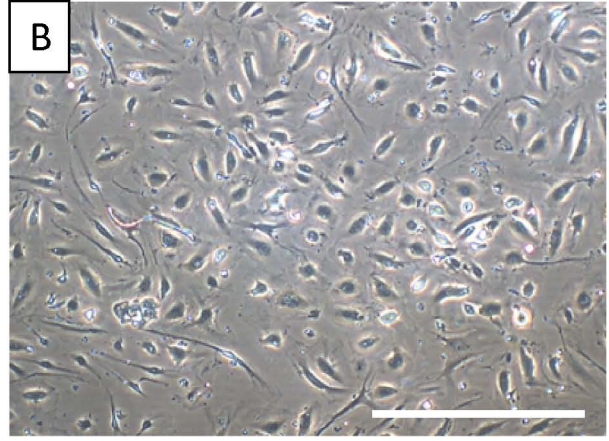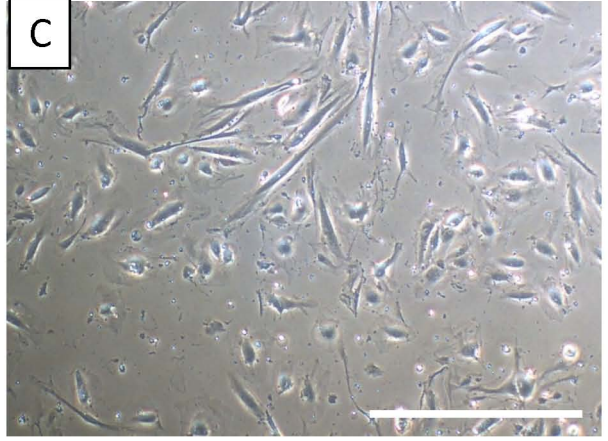

Conditioned by PAFLCs

Conditioned by MFLCs

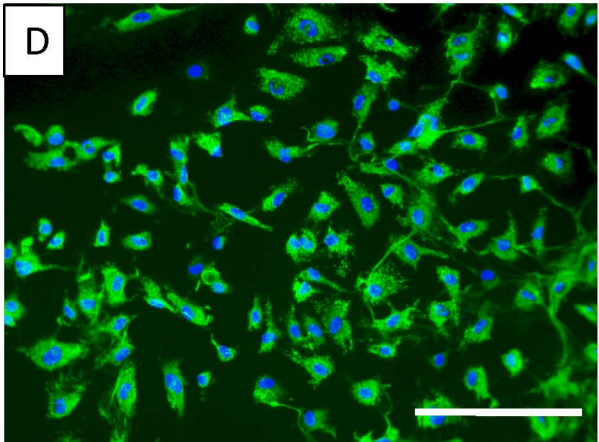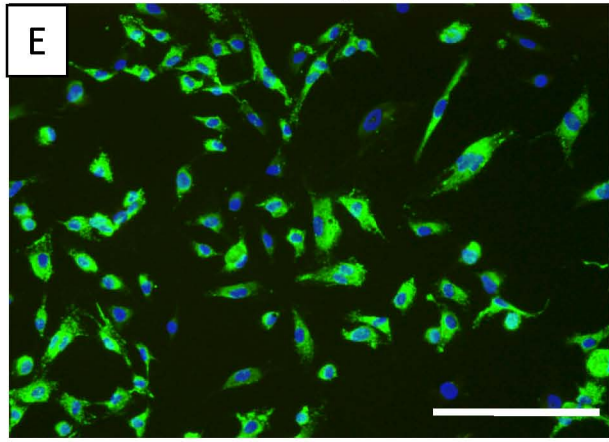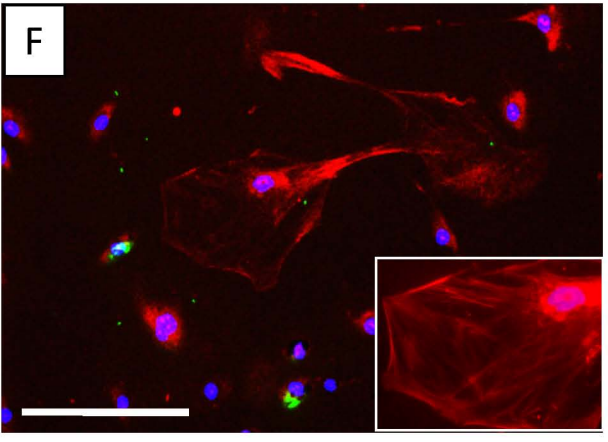

G

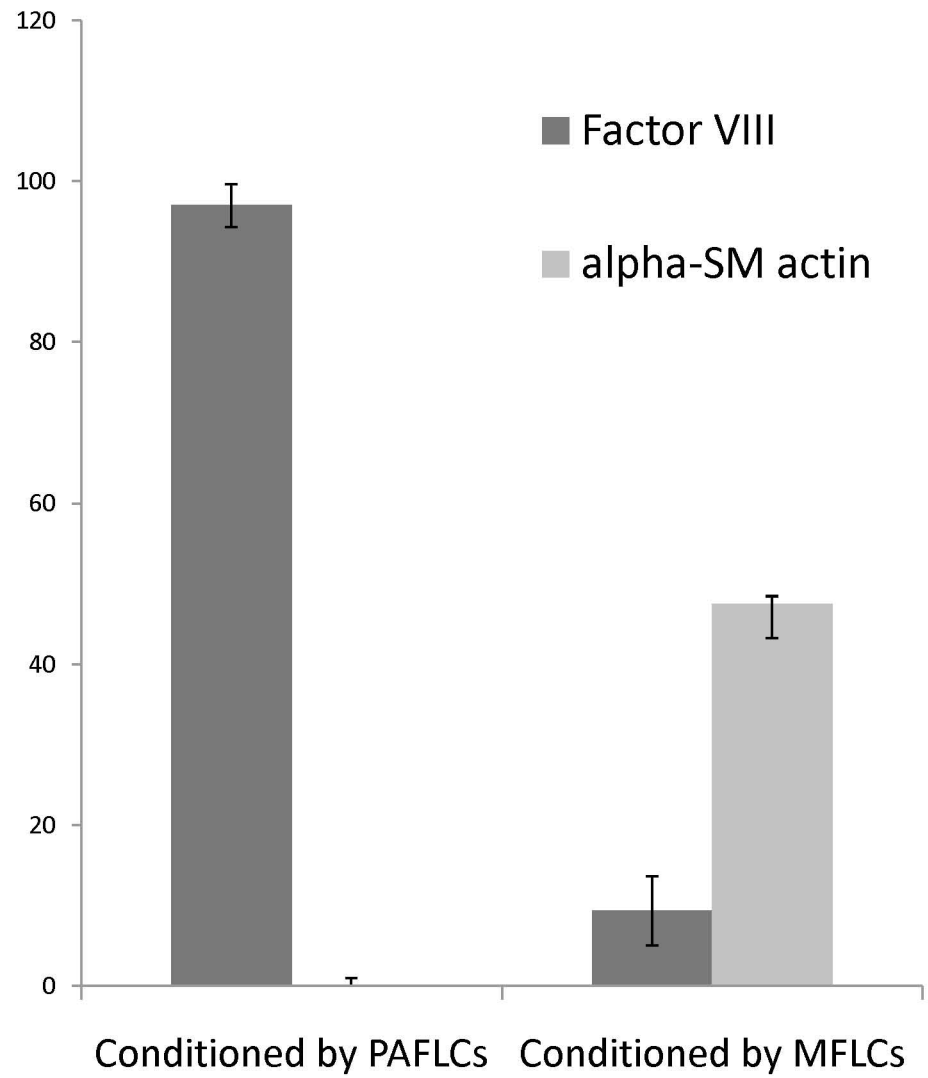

p<0.05 Conditioned by PAFLCs vs Conditioned by MFLCs

H

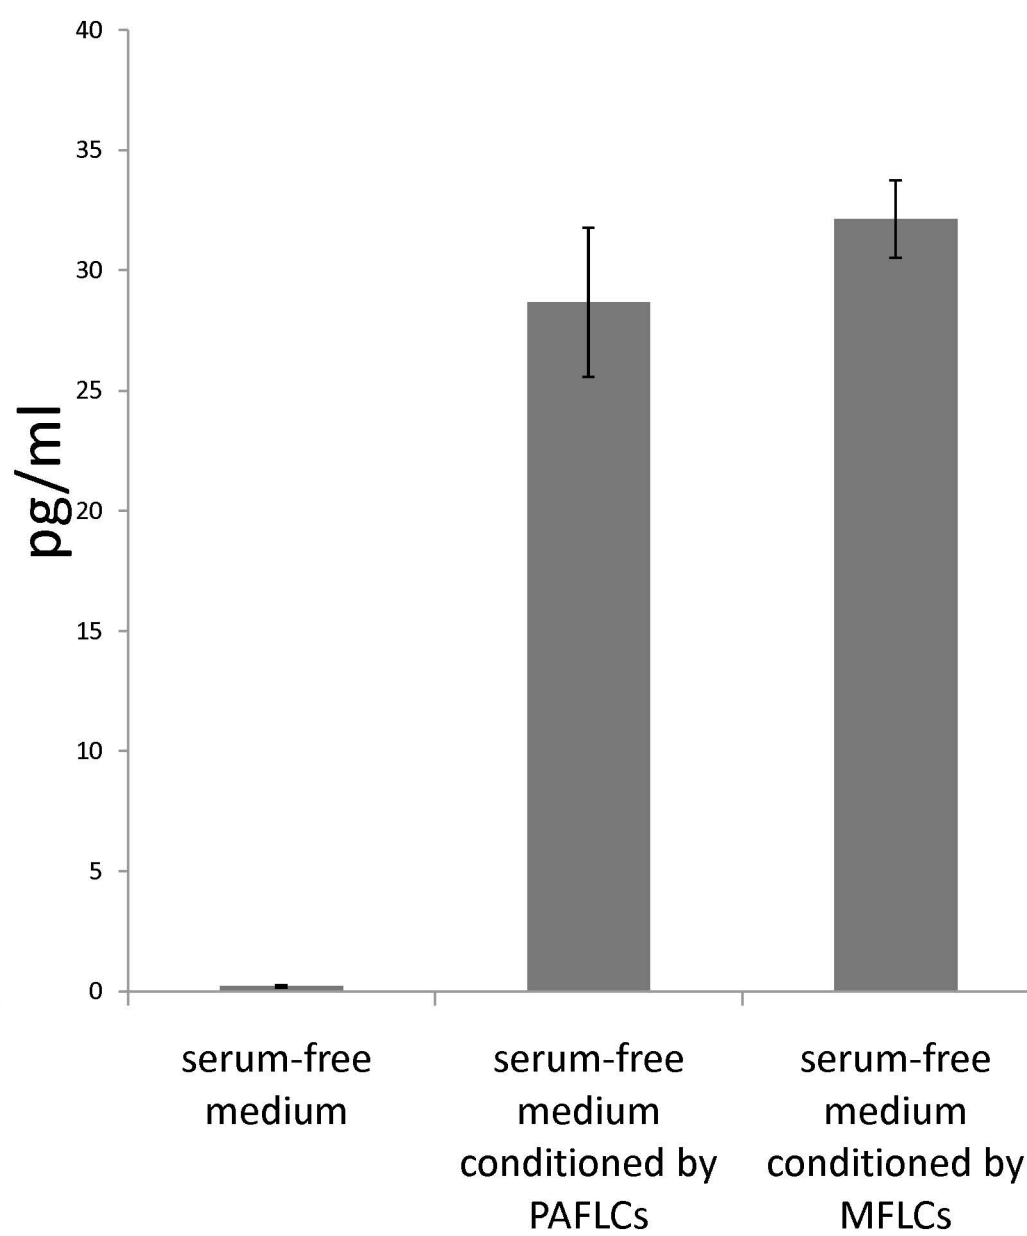

Supplement: MOESM3 [file 9425412]
